# Supplementary material
Source: PubMed Central journal article supplement (PMC6980252)

Supporting Information for  
**A Metallomic Approach to Assess Associations of Serum Metal Levels With Gallstones and Gallbladder Cancer**

Mei-Hsuan Lee, Yu-Tang Gao, Yu-Han Huang, Emma E. McGee, Tram Lam, Bingsheng Wang, Ming-Chang Shen, Asif Rashid, Ruth M. Pfeiffer, Ann W. Hsing, and Jill Koshiol

**Supporting TABLE S1. Association of 18 Metals With Gallbladder Cancer and Gallstones**

| Metals      | <i>P</i> value for GBC | Bonferroni corrected<br><i>P</i> value for GBC | <i>P</i> value for gallstones | Bonferroni corrected<br><i>P</i> value for gallstones |
|-------------|------------------------|------------------------------------------------|-------------------------------|-------------------------------------------------------|
| Arsenic     | <0.0001                | <b>&lt;0.0001</b>                              | <0.0001                       | <b>&lt;0.0001</b>                                     |
| Boron       | <0.0001                | <b>&lt;0.0001</b>                              | <0.0001                       | <b>&lt;0.0001</b>                                     |
| Cadmium     | <0.0001                | <b>&lt;0.0001</b>                              | 0.1052                        | 1.0000                                                |
| Calcium     | 0.0899                 | 1.0000                                         | 0.0003                        | <b>0.0055</b>                                         |
| Chromium    | 0.0002                 | <b>0.0039</b>                                  | 0.2133                        | 1.0000                                                |
| Cobalt      | 0.3754                 | 1.0000                                         | 0.4433                        | 1.0000                                                |
| Copper      | <0.0001                | <b>&lt;0.0001</b>                              | 0.1294                        | 1.0000                                                |
| Iron        | <0.0001                | <b>&lt;0.0001</b>                              | 0.0028                        | 0.0504                                                |
| Lithium     | 0.0022                 | <b>0.0391</b>                                  | <0.0001                       | <b>&lt;0.0001</b>                                     |
| Magnesium   | 0.0001                 | <b>0.0021</b>                                  | 0.9341                        | 1.0000                                                |
| Manganese   | 0.0030                 | 0.0536                                         | 0.1535                        | 1.0000                                                |
| Molybdenum  | <0.0001                | <b>0.0001</b>                                  | 0.0002                        | <b>0.0028</b>                                         |
| Nickel      | 0.3980                 | 1.0000                                         | 0.0124                        | 0.2225                                                |
| Phosphorous | 0.0249                 | 0.4490                                         | <0.0001                       | <b>0.0004</b>                                         |
| Selenium    | <0.0001                | <b>&lt;0.0001</b>                              | 0.3790                        | 1.0000                                                |
| Sulfur      | <0.0001                | <b>&lt;0.0001</b>                              | 0.0180                        | 0.3248                                                |
| Vanadium    | <0.0001                | <b>&lt;0.0001</b>                              | 0.4040                        | 1.0000                                                |
| Zinc        | 0.8736                 | 1.0000                                         | 0.1944                        | 1.0000                                                |

*P* values statistically significant after Bonferroni correction are indicated in bold.

Abbreviation: GBC, gallbladder cancer.

**Supporting FIG. S1.** Correlations of metals in population-based controls (N = 851).

**Supporting FIG. S2.** Odds ratios of gallstones by metal levels. The bar histograms represent the frequency distribution of each metal in the study sample, including gallstone patients and population-based controls. The tick marks at the bottom of the histogram in each figure represent the metal levels of gallstone patients.

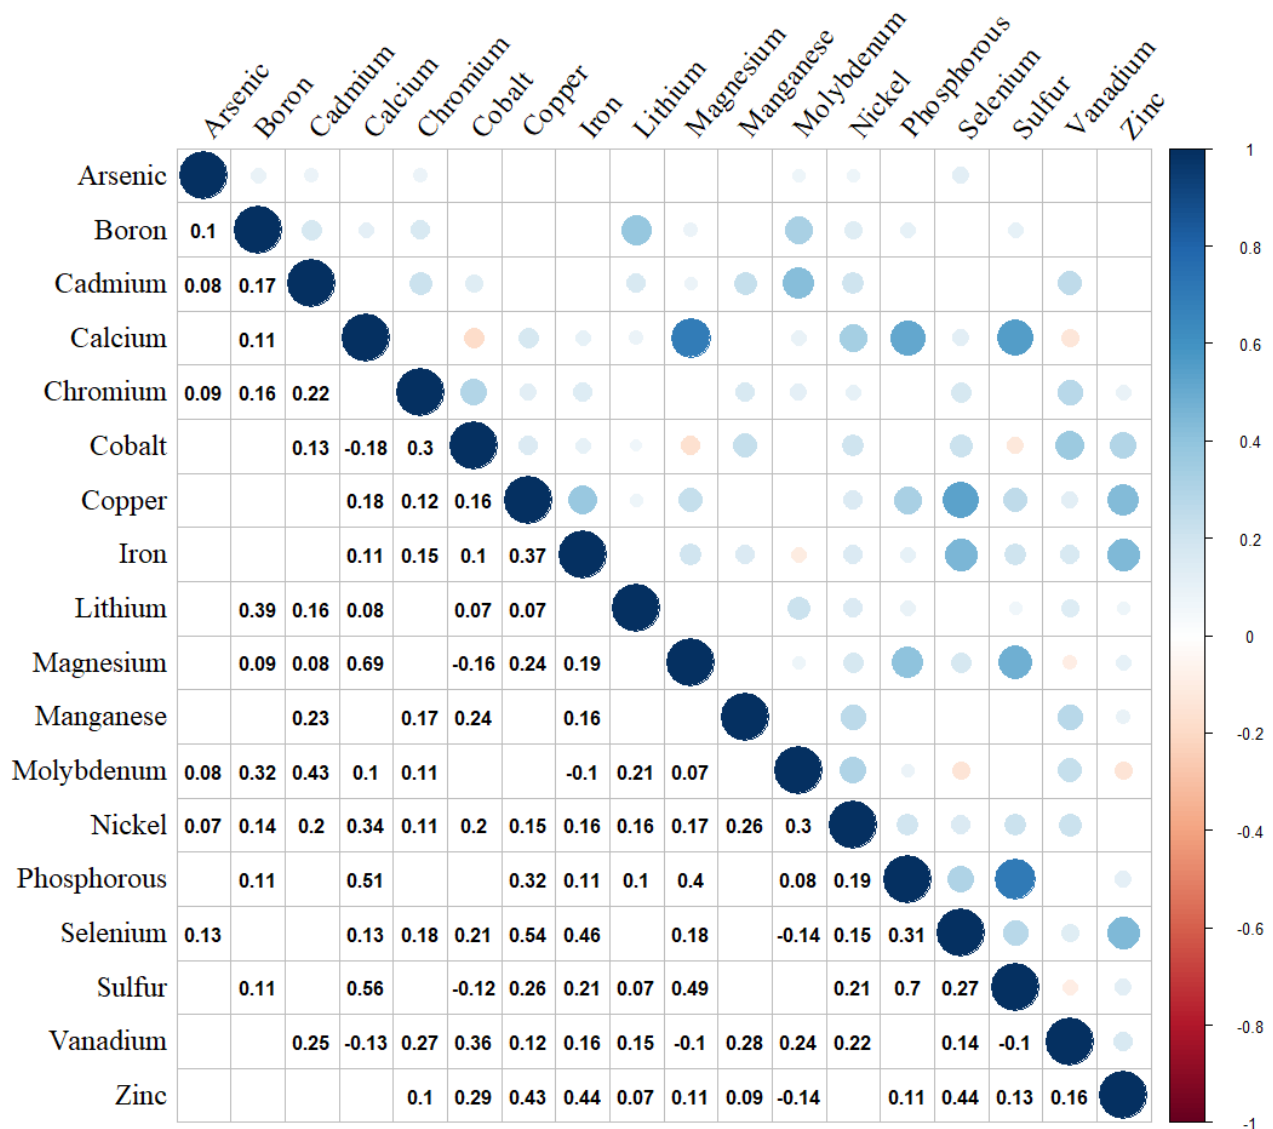

All of the correlations were significant ( $P < 0.05$ ).

Supporting FIG. S1

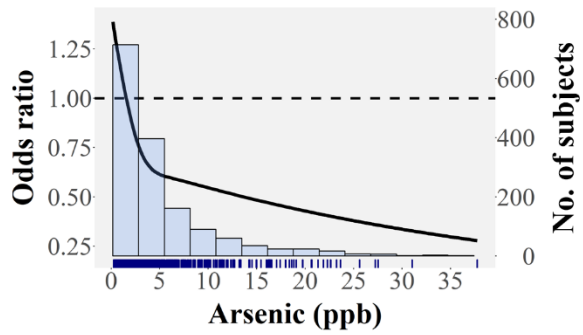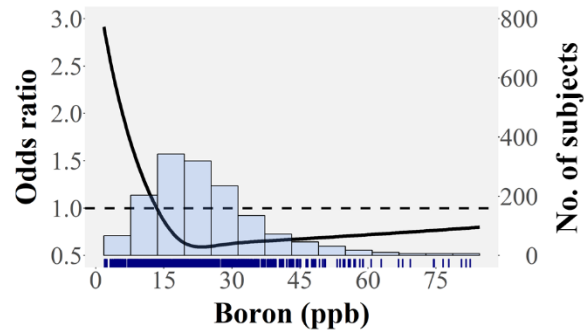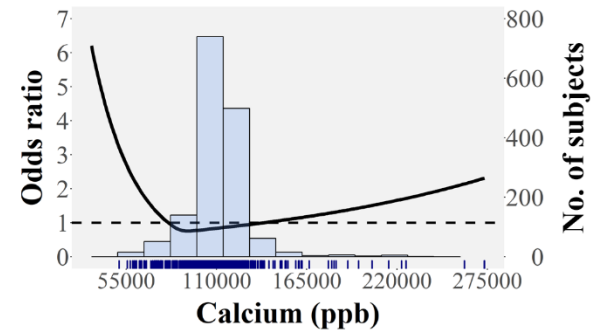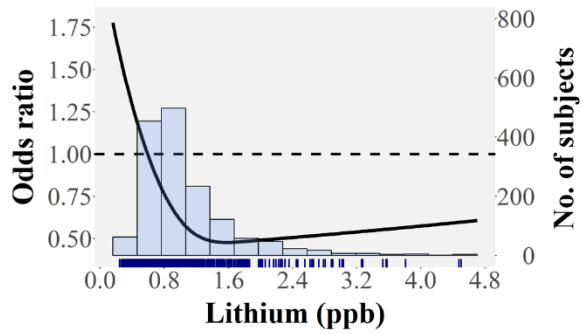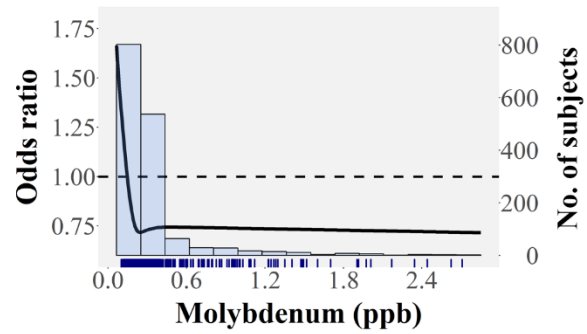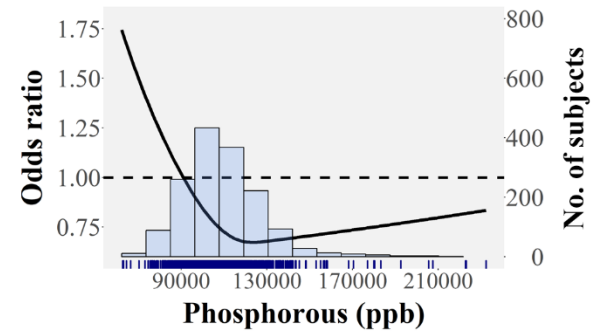

Supporting FIG. S2

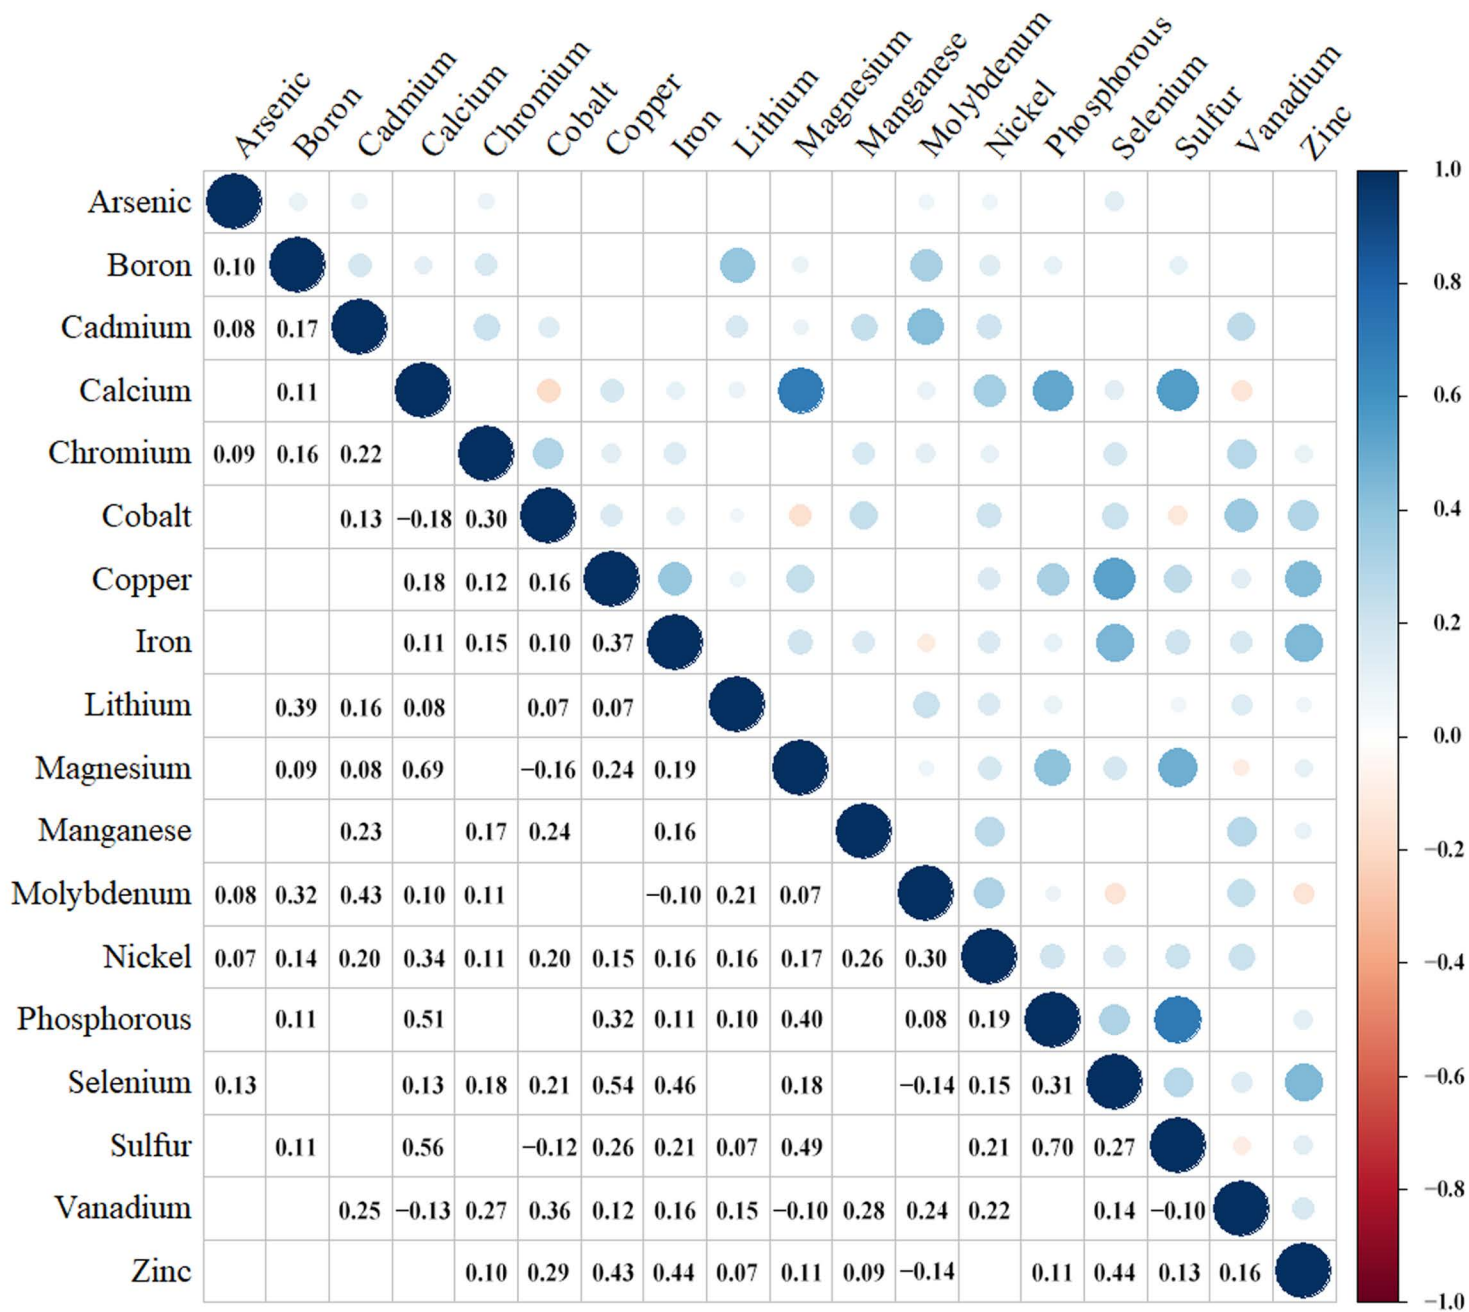

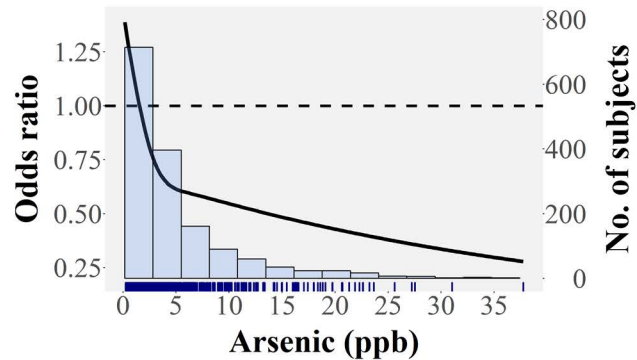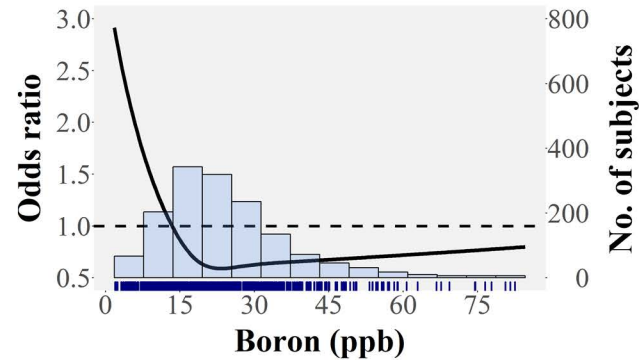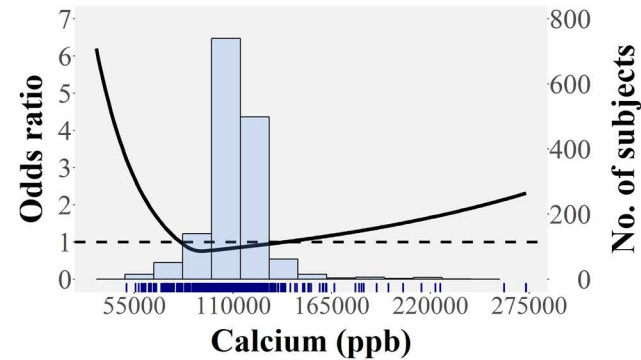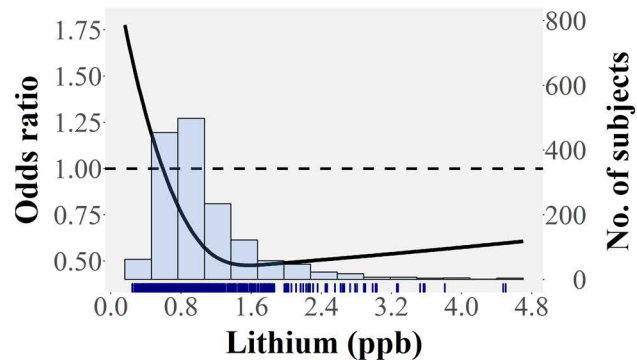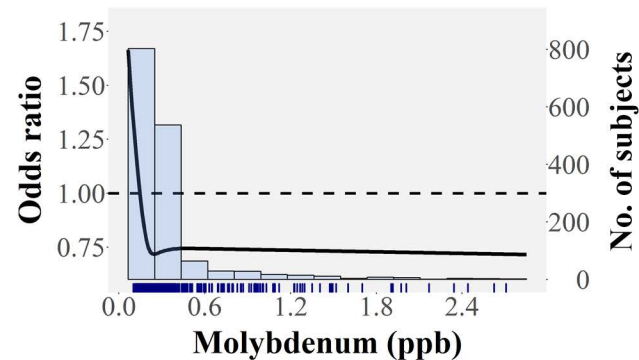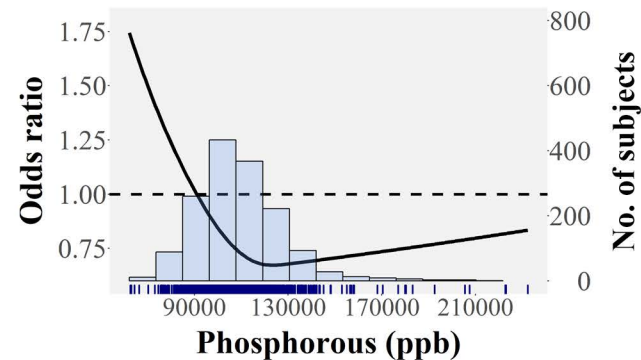

Supplement: NIHMS1042685-supplement-Supp_info.pdf [file NIHMS1042685-supplement-Supp_info.pdf]
